# Supplementary material for: Three-Dimensional Optical Trapping with a Low-NA Objective using a Flat-top Beam
Source: Research Square preprint supplement (doi:10.21203/rs.3.rs-5039529/v1), 2025-04-28
Supplement: Supplementary file 1 [file 883b3ebc3e55917f7507cd87.docx]

# Three-Dimensional Optical Trapping with a Low-NA Objective using a Flat-top Beam

# Laurynas Lialys1 and Shima Fardad1,2,*

1Department of Electrical Engineering & Computer Science, University of Kansas, Lawrence, 66045, USA

2I2S, Institute for Information Sciences, University of Kansas, Lawrence, 66045, USA

*sfardad@ku.edu

# Extinction Cross-Section Calculation

For a sphere, the extinction cross-section Cext can be expressed in terms of the Mie coefficients *an* and *bn* as [1]:


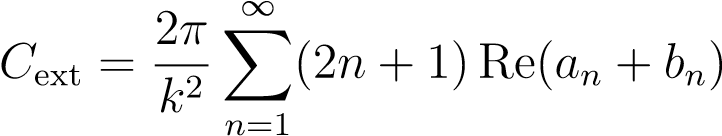


where *k* = 2*πn*2*/λ* is the wavenumber in the surrounding medium, *λ* is the vacuum wavelength, and *n*2 is the refractive index of the medium. The Mie coefficients *an* and *bn* describe the electric and magnetic multipole scattering amplitudes for a sphere of radius *r*, relative refractive index *m* = *n*1*/n*2, and size parameter *q* = 2*πRn*2*/λ*, where: *r* is the radius of the sphere. The number of terms *N* to retain in the Mie expansion is accurately estimated via the widely used empirical rule [2] *N* ≈ *q* + 4*q*1*/*3 + 2 rounded up to the next integer. This ensures accurate computation of the scattering and extinction efficiencies while maintaining computational efficiency. For our experiments, we considered polystyrene spheres (*n*1 = 1*.*58) in water (*n*2 = 1*.*33) illuminated at a wavelength of *λ* = 532*nm*. The number of coefficients to be retained is then *N* = 23. The computed coefficients are shown in Fig. S1. The resulting extinction cross-section is *Cext* ≈ 2*.*2*µm*2.


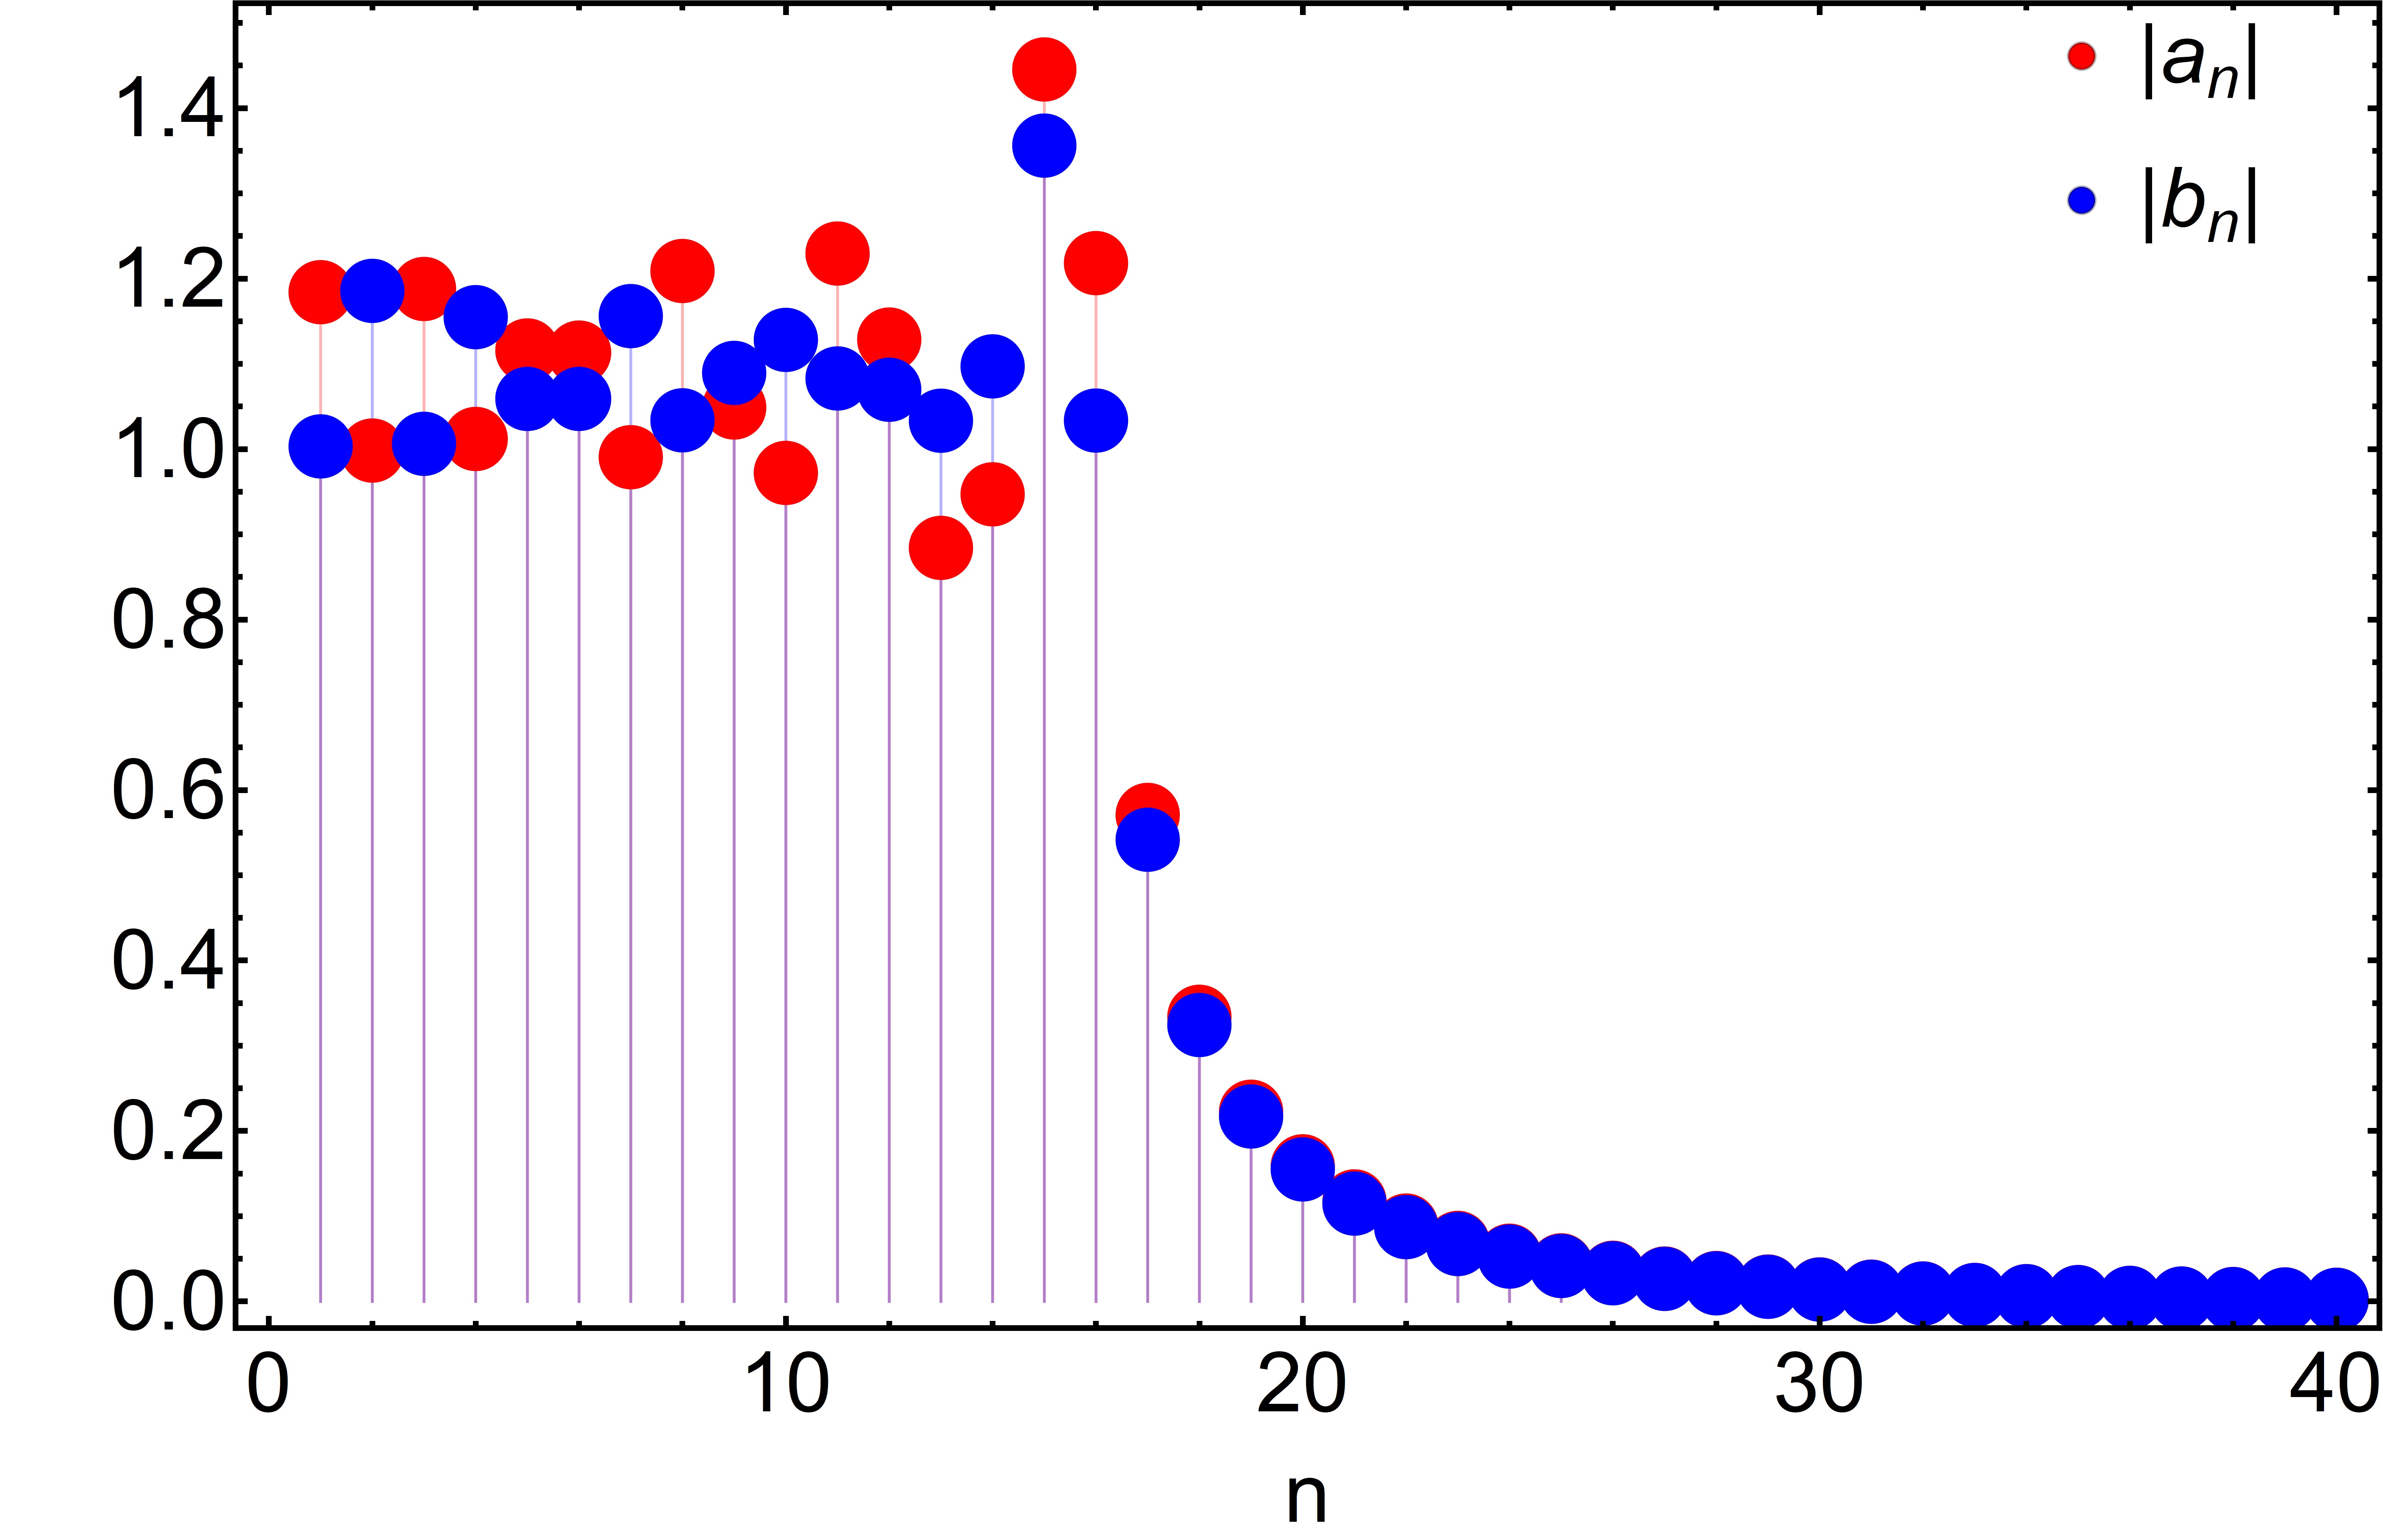


Fig. S1. Magnitude of Mie coefficients |*an*| and |*bn*| as a function of size parameter *x*. Peaks correspond to electric and magnetic resonances of different orders.

# References

1. Craig F Bohren and Donald R Huffman. Absorption and scattering of light by small particles. John Wiley & Sons, 2008.
2. Warren J Wiscombe. Mie scattering calculations: Advances in technique and fast, vectorspeed computer codes, volume 10. National Technical Information Service, US Department of Commerce, 1979.
